# Supplementary material
Source: publisher figshare collection journal article supplement (https://karger.figshare.com/ndownloader/files/22746341)
Supplement: Supplementary file 1 [file 22746341]

**Supplementary table 4.**

Expression of IL-32 (ng/mL) in AAA patients divided into different clinical variables.

| **Variable** | Yes | No | p-value |
| --- | --- | --- | --- |
| Statins | 21.3±52.0 (n=112) | 18.5±51.4 (n=28) | NS |
| CHD | 14.6±44.0 (n=58) | 24.3±56.3 (n=77) | NS |
| CVD | 1.9±3.2 (n=16) | 22.6±54.3 (n=119) | NS |
| Hypertension | 17.5±47.0 (n=115) | 35.5±71.2 (n=20) | NS |
| Hyperlipedemia | 20.8±51.4 (n=83) | 20.8±54.9 (n=46) | NS |
| Renal dysfunction | 37.8±72.9 (n=14) | 181.0±48.3 (n=121) | NS |
| DM2 | 15.7±34.2 (n=23) | 21.8±54.6 (n=117) | NS |

CHD=coronary heart disease, CVD=cardiovascular disease, DM2=diabetes mellitus type 2. NS=Not significant. Significance was analysed using one way ANOVA.
